# Supplementary material for: Optimizing Magnetic, Optical, and efficient photocatalytic properties of chromite material for dye degradation
Source: Research Square preprint supplement (doi:10.21203/rs.3.rs-7249845/v1), 2025-08-12
Supplement: Supplementary file 1 [file c06701e399b23ecc7351f31b.docx]

**Tab.1:** Band gap and Urbach energy values ​​relating to chromites NixCd1-xCr2O4.

| X | **sample** | **Directe bande gap (eV)** | **Eu(eV)** | **ref** |
| --- | --- | --- | --- | --- |
| 0.0 | CdCr2O4 | 3.44 | - | **[35]** |
| 0.3 | Ni0.3Cd0.7Cr2O4 | 2.20 | 0.21 | **[1]** |
| 0,5 | Ni0.5Cd0.5Cr2O4 | 2.24 | 0.40 | **this study** |
| 0.7 | Ni0.7Cd0.3Cr2O4 | 2.21 | 0.58 | **[8]** |
| 1 | NiCr2O4 | 1.72 | - | **[39]** |

**Tab.2:** Computed values of optical parameters for the chromite compoundNi0.5Cd0.5Cr2O4.

|  |  | **ε∞** | **ωp (rad s-1)** | **x1050(g-1cm-3)** |
| --- | --- | --- | --- | --- |
| Ni0.5Cd0.5Cr2O4 | 4.30 | 3,26.106 | 1.42 | 0.33 |

**Tab.3**: Photocatalytic properties of spinel chromite ACr2O4 such as **A{Fe, Ni, NxMg₁₋ₓ, Cu, Zn and Cd}**

| **Sample** | **Poluant/s** | **C. time (min)** | **L. source** | **R. capcity**  **%** | **Dg(nm)** | **Eg(eV)** | **Ref** |
| --- | --- | --- | --- | --- | --- | --- | --- |
| **Cr2O3** | MB | 240 | UV-Vis | 88 | 30 | 3.16 | **[56]** |
| **CdCr2O4/Ag** | MB | 70 | UV | 37 | 32 | 3.35 | **[57]** |
| **FeCr2O4/Ag** | MB | 70 | UV | 56 | 57 | 3.2 | **[60]** |
| **NiCr2O4** | MB | 90 | Vis | 40 | 20.23 | 2,1 | **[58]** |
| **Ni0.6Mg0.4Cr2O4** | MB | 90 | UV-Vis | 65 | 15.16 | 2.36 | **[58]** |
| **MgCr2O4** | MB | 90 | UV-Vis | 50 | 7.39 | 2.73 | **[58]** |
| **(NiCd)0.5Cr2O4** | MB | 180 | UV-Vis | 73 | 38.5 | 2.2 | **This study** |
| **CuCr2O4** | MB | - | Vis | 80.6 | 5-35 | 1.4 | **[59]** |
| **ZnCr2O4** | MB | 70 | UV-Vis | 96.5 | 35 | 2.8 | **[61]** |

**Tab.4:** Rate constants for MB degradation using Ni0.5Cd0.5Cr2O4

|  | **Ni0.5Cd0.5Cr2O4** |
| --- | --- |
| **K-1(min-1)** | 0.00741 |
| **R2** | 0.99765 |
